# Palliative care in hospital, hospice, at home: results from a systematic review

I. G. Finlay, I. J. Higginson, D. M. Goodwin, A. M. Cook, A. G. K. Edwards, K. Hood, H.-R. Douglas & C. E. Normand

University of Wales College of Medicine, Velindre NHS Trust, Velindre Hospital, Cardiff, UK

## Introduction

Palliative and hospice care has rapidly expanded, so that by January 2000 there were over 6560 service teams in 87 countries, with 933 teams in the UK, over 3600 in North America and over 350 in Australasia [1]. Care provision is in many settings; it has been estimated that in the UK about 11% of patients die in hospices, whereas over half of all those with a terminal phase to their illness die in hospital beds. In some areas, concerted efforts by home care services have seen a rise in deaths at home where this is the patient and the family's wish, but the trend is far from universal.

All the palliative care teams aim to alleviate distress through symptom control and attention to psychosocial concerns. They also seek to coordinate care and improve communication between professionals and with the individual patient and family. The constitution of the team varies from setting to setting. Some are nurse-only teams working with the primary care team in the community, although the trend is increasingly for inter-professional teams in all settings.

Evidence to support the development of inter-professional teams rather than uni-disciplinary teams has been developing. A systematic review of the literature was undertaken to assess whether there was an effect of palliative care teams. The effects of sub groups of teams operating in hospital, home or inpatient hospice, or with different groups of patients were considered. Home death rate was considered separately as it does not fit easily within one of these two groups. A total of 43 studies were identified which provided data on the place of care. The data extracted from the selected papers representing these 43 studies is considered in independent, but complementary, analyses. The qualitative and quantitative analyses need to be considered together, so as to draw a complete picture.

## Methods

From the data extraction, 15 outcomes were selected from five areas. These outcomes are given in Table 1.

For each analysis it was necessary to include only one outcome per study, so a hierarchy for symptoms had to be devel-

oped. This is given in Table 2. When all the patient outcomes were combined, they followed the order of hierarchy given in Table 1. Similar approaches were adopted in other categories: carer outcomes were combined giving carer burden/morbidity preference over satisfaction. Pre-bereavement burden was considered the highest outcome.

For each outcome the effect size was calculated by dividing the estimated mean difference or the difference in proportions by the sample standard deviation (SD) [2], which allows comparison between outcomes measured on different scales. If analysed without further adjustment, equal importance would

**Table 1.** Outcomes extracted from included studies

| Group           | Outcome                            |
|-----------------|------------------------------------|
| Patient         | Pain                               |
|                 | Other symptoms                     |
|                 | Quality of life                    |
|                 | Satisfaction                       |
|                 | Referral to other services         |
|                 | Therapeutic interventions          |
|                 |                                    |
| Carer (pre-b.)  | Satisfaction                       |
|                 | Burden/morbidity                   |
| Carer (post-b.) | Satisfaction                       |
|                 | Burden/morbidity                   |
| Patient/carer   | Home death rates                   |
|                 | Health service use and costs       |
| Professionals   | Increased adherence to guidelines  |
|                 | Prescribing rationale              |
|                 | Health care/voluntary sector costs |

Pre-b., pre-bereavement; post-b., post-bereavement.

**Table 2.** Hierarchy of symptoms used for extraction of 'other' category

| Hierarchy | Symptoms               |
|-----------|------------------------|
| 1         | Nausea/vomiting        |
| 2         | Constipation           |
| 3         | Breathlessness         |
| 4         | Mouth discomfort       |
| 5         | Sleeplessness/insomnia |

be given to large and small studies. Many analysts therefore weight by the sample size in each study, but this tends to over-emphasise large studies and can render the contribution from small studies negligible. Following Vine et al. [3] the analyses described were therefore weighted by the square root of the sample size.

The extracted data were then grouped for the particular setting.

## Results

### Quality of the studies

Of the 43 studies, much of the evidence was of poor quality. Most of the studies were of grade III, and those studies of grade I or II were often flawed, in some instances so much so that no results were found. Within certain outcomes there were enough studies to look at the effect of palliative care terms on specific outcomes.

### Patient outcomes overall

The six patient outcomes extracted related to pain control, 'other symptoms', quality of life, satisfaction, referral and therapeutic interventions. Table 3 below shows the descriptive statistics for the effect size for these outcomes.

The weighted statistics in Table 3 are adjusted by the square root of the proxy sample size. The first three outcomes in the

table—pain, other symptoms and quality of life—all have enough studies to be considered individually.

However, the question of whether palliative care teams have an overall effect on patient outcomes can be investigated by combining these outcomes into a single variable. For each study only one outcome can be included (because of the correlation within studies described earlier) and the list of outcomes above was considered to be hierarchical for the creation of this variable. This means that if a study reported pain control and quality of life, then the pain outcome was taken as the principal outcome for this study for this analysis of a composite patient outcome variable.

### Palliative care in hospital

Eight studies were identified that specifically examined the intervention of a hospital team or service (Table 4). A further four studies considered interventions that included a component of hospital support or care. The interventions were very varied; for example, individual nurses with unclear training, individual doctors or multiprofessional teams. Outcomes tended to include time in hospital, total length of time in palliative care and a range of symptoms or quality of life indicators.

Only one of the eight studies specifically examining a hospital team was grade II and had any comparison group (one study hops cgrade 11). This study suggested that those in the care of the hospital team spent less time in hospital, although an observational study of the same service found that quality of life deteriorated during care over time. The team consisted of one nurse with surgical and other support. The remaining studies were grade III, indicating that these were observational or retrospective studies. In some of these studies improvements in symptom management were found, although many of the potential biases and confounding variables were not accounted for.

In the four studies where the hospital based components of the service had not been separated from the other elements, it is difficult to judge the degree to which the hospital based component of the service is effective. One of these studies

**Table 3.** Descriptive of the effect size for the patient outcomes

|                    | Pain         | Other symptoms | QOL           | Satisfaction  | Referral | Therapeutic interventions |
|--------------------|--------------|----------------|---------------|---------------|----------|---------------------------|
| <i>N</i>           | 20           | 14             | 17            | 5             | 1        | 4                         |
| Mean               | 0.41         | 0.32           | 0.18          | 0.38          | 0.24     | 0.52                      |
| SD                 | 0.50         | 0.48           | 0.41          | 0.27          | –        | 0.40                      |
| Min                | –0.14        | –0.11          | –0.62         | 0.05          | –        | 0.03                      |
| Max                | 2.04         | 1.76           | 0.87          | 0.69          | –        | 0.98                      |
| Weighted mean      | 0.37         | 0.20           | 0.20          | 0.24          | –        | 0.43                      |
| SE (weighted mean) | 0.13         | 0.15           | 0.12          | 0.14          | –        | 0.23                      |
| 95% CI             | (0.11, 0.63) | (–0.10, 0.50)  | (–0.04, 0.44) | (–0.04, 0.52) | –        | (–0.01, 0.87)             |

CI, confidence interval; QOL, quality of life; SD, standard deviation; SE, standard error.

**Table 4.** Results of studies of hospital based services in palliative care

| Author, country                                                                                                      | Grade and signal score | Setting                                                      | Intervention                                                                                                                      | Outcome                                                                                                           |
|----------------------------------------------------------------------------------------------------------------------|------------------------|--------------------------------------------------------------|-----------------------------------------------------------------------------------------------------------------------------------|-------------------------------------------------------------------------------------------------------------------|
| Studies where the intervention was primarily a hospital team or service                                              |                        |                                                              |                                                                                                                                   |                                                                                                                   |
| Axelsson et al. [7]; Sweden                                                                                          | IIB 10/15              | Ostersund, hospital, city area                               | One specialist nurse, surgeon and other colleagues support                                                                        | Less time in hospital for intervention group (3 versus 10 days), no other utilisation differences                 |
| Axelsson and Sjoden [8]; Sweden                                                                                      | IIIC 12/15             | Ostersund, hospital, city area                               | One specialist nurse, surgeon and other colleagues support                                                                        | Quality of life deteriorated during care                                                                          |
| Bennett and Corcoran [9]; UK                                                                                         | IIIC 12/15             | Leeds hospital, city area                                    | Two, then three nurses supported by others in hospital                                                                            | Increased referrals to home care team, longer time in palliative care                                             |
| Edmonds et al. [10]; UK                                                                                              | IIIC 11/15             | London, inner-city area                                      | Two nurses plus two part-time doctors                                                                                             | Symptoms improved during care by team                                                                             |
| Ellershaw et al. [11]; UK                                                                                            | IIIC 12/15             | London, inner-city area                                      | Nursing sisters and doctors                                                                                                       | Symptoms improved during care by team                                                                             |
| McQuillan et al. [12]; Wales                                                                                         | IIIB 11/15             | Cardiff, city area of Wales                                  | Palliative medicine doctor, with senior doctor support and pharmacist                                                             | Some changes in adherence to prescribing, but clinical guidelines were not used, face to face discussions instead |
| Wenk et al. [13]; Argentina                                                                                          | IIIC 7/15              | San Nicolas hospital, urban area                             | Anaesthesiologist                                                                                                                 | Pain improved during care                                                                                         |
| Zwahlen [14]; France                                                                                                 | IIIC 10/15             | Regional hospital, city, urban and rural area                | Multiprofessional team                                                                                                            | Changes in morphine prescribing in hospital and other practice                                                    |
| Studies where the intervention included some hospital activity of the service, although the intervention was broader |                        |                                                              |                                                                                                                                   |                                                                                                                   |
| Addington-Hall et al. [15]; UK                                                                                       | IB 13/15               | London hospital, inner-city area                             | Two non-specialist coordinating nurses working across patients in the region                                                      | No difference in symptoms or satisfaction, fewer hospital days                                                    |
| Higginson et al. [16]; UK                                                                                            | IIIB 13/15             | Two London palliative care services, inner-city and suburban | Multiprofessional palliative care teams working across home and hospital                                                          | Improved symptoms, outcomes and satisfaction during care. Greater satisfaction with team than with hospital staff |
| Higginson and McCarthy [17]; UK                                                                                      | IIIC                   | London palliative care service, inner city                   | Multiprofessional palliative care teams working across home and hospital                                                          | Improved pain and other symptoms but breathlessness deteriorated                                                  |
| Ventafriidda et al. [18]; Italy                                                                                      | IIIB 10/15             | Milan hospital, city area                                    | Hospital team part of whole service, four hospital nurses (seven doctors and 100 volunteers worked across hospital and home care) | Improvements during care in some symptoms and aspects of quality of life                                          |

was a randomised controlled trial, the intervention was a co-ordinating service, and similar to the Swedish study, it appeared to lead to reduced time in hospital. The other studies were all grade III, and improved outcomes were found in some areas.

Taken together, the evidence seems to suggest that some of the palliative care teams or services can reduce time in hospital. This can be by a specialist nurse or a coordinating service, but it does not affect outcomes for the patients or carers. In one study quality of life deteriorated over time, but the multi-professional teams appeared to improve outcomes in some instances.

**Home care**

Home care services have been subject to the most evaluation. A total of 22 studies were identified that specifically examined the intervention of a home care team or service (Table 5). However, the nature of the interventions were very varied; for example, individual nurses with unclear training, individual doctors or multiprofessional teams. Teams were sometimes based from hospitals or from hospices or palliative care centres (both inpatient and home care). Some of the studies included specialists in palliative care, some generalists and some were not clear. Most of the studies were grade III, indicating that there was little rigorous comparative element in the study design. There was a wider range of settings including more multicentre studies and rural as well as urban and inner-city studies, although, as for hospital care, city based studies predominated.

In general, the outcomes were more positive than negative, in particular, indicating improved satisfaction and pain and symptom control when home care services, with multiprofessional teams of staff trained to some extent in palliative care, were compared with conventional care. Importantly, the three randomised controlled trials of this type of intervention produced similar findings. Note though that all of these are in the USA. There were two other randomised controlled trials, both in the UK and of non-specialist services, one of a co-ordinating service and one of basic nursing home support. These produced more equivocal results for patient outcomes.

All studies that considered costs suggested lower costs for the home care group, irrespective of the type of intervention.

Taken together the results suggest that home care is cost-effective. It seems that staff need to work in multiprofessional teams and to have had training in palliative care to improve patient outcomes.

**Inpatient hospice or palliative care services**

Only three studies were identified that specifically examined the intervention of an inpatient hospice service operating on its own. A further six studies considered interventions that were integrated inpatient hospice care and home care (Table 6). Both small and large units were considered, with very varying

**Table 5.** Results of studies of home care services in palliative care

| Author, country                                                         | Grade and signal score | Setting                                                                                      | Intervention                                                                                                              | Outcome                                                                                               |
|-------------------------------------------------------------------------|------------------------|----------------------------------------------------------------------------------------------|---------------------------------------------------------------------------------------------------------------------------|-------------------------------------------------------------------------------------------------------|
| <i>Studies where the intervention was primarily a home care service</i> |                        |                                                                                              |                                                                                                                           |                                                                                                       |
| Bloom and Kissick [19]; US                                              | IIIB 7/15              | Two large teaching hospitals. Philadelphia, city                                             | Home care medical supervision                                                                                             | Cost differences in last 2 weeks of life, home care 10.5 times cheaper than hospital care             |
| Dessloch et al. [20]; Germany                                           | IIIB 9/15              | Not able to determine                                                                        | Home care with doctor and nurse trained in palliative care                                                                | More positive comments about home care – environment, control over activities, nursing                |
| Grande et al. [21]; UK                                                  | IB 12/15               | City and urban areas                                                                         | Hospital at home with 24 h non-specialist home care nursing                                                               | No difference in likelihood of dying at home, decreased out of hours GP visits                        |
| Higginson and Hearn [22]; UK                                            | IIIC 12/15             | Eleven palliative care teams in city, urban, suburban and rural areas of England and Ireland | Specialist multiprofessional home care teams including doctors, nurses and other professionals trained in palliative care | Significant improvements in pain during care                                                          |
| Hinton [23]; UK                                                         | IIIC 13/15             | London based home care team in city and suburban areas                                       | Specialist multiprofessional home care teams including doctors, nurses and other professionals trained in palliative care | Home care was rarely criticised. Relatives suffered emotionally more than patients in the final month |

|                                 |            |                                                        |                                                                                                                           |                                                                                                                     |
|---------------------------------|------------|--------------------------------------------------------|---------------------------------------------------------------------------------------------------------------------------|---------------------------------------------------------------------------------------------------------------------|
| Hughes et al. [24]; US          | IB 12/15   | Urban and suburban area                                | Multiprofessional 24 h home care team, operating from a hospital                                                          | Higher levels of satisfaction and lower costs than control group                                                    |
| Jones [25]; UK                  | IIIC 13/15 | Urban and rural areas                                  | Specialist nurses working with GP and community nurses                                                                    | Most successful team across a range of outcomes was specialist nurse with GP and community nurse                    |
| McCorkle et al. [26]; US        | IB 9/15    | City and suburban                                      | 1. Home care nursing (oncology nurses) and 2. Multiprofessional team (non specialist)                                     | Control group of office based care had more symptom distress and social dependency                                  |
| McCusker and Stoddard [27]; US  | IIIB 10/15 | Inner city, New York                                   | 24 h home care services, non-specialist nursing, social work and equipment                                                | Lower costs and fewer hospital days compared to groups not receiving the service, and as team expanded              |
| McMillan [28]; US               | IIIC 8/15  | West central Florida, rural, suburban and urban        | Hospice home care service, training of staff and mix not described                                                        | Quality of life of caregivers 'maintained' over time                                                                |
| McMillan and Mahon [29]; US     | IIIB 12/15 | Florida, rural, suburban and urban                     | Hospice home care, nurse, physician, social workers, clergy, volunteers                                                   | Quality of life improved for some patients and deteriorated for others, pain control improved                       |
| McMillan and Mahon [30]; US     | IIB 12/15  | Florida, rural, suburban and urban                     | Hospice service—not described                                                                                             | Caregiving has a negative impact on health, when carers compared with non-caregiving adults                         |
| McWhinney et al. [31]; Canada   | IC 12/15   | Ontario, urban, suburban some rural                    | Home care support team, multiprofessional                                                                                 | No results—sample size not maintained                                                                               |
| Mulligan [32]; Wales            | IIB 14/15  | South Wales, city and rural                            | Specialist home care team, nurses and volunteers                                                                          | Intervention patients showed greater improvement in pain, more died at home                                         |
| Parkes [33]; UK                 | IIIB 11/15 | London based home care team in city and suburban areas | Specialist multiprofessional home care teams including doctors, nurses and other professionals trained in palliative care | Patients in care of service spent more time at home and had higher satisfaction than those who had not received it  |
| Peruselli et al. [34]; Italy    | IIIC 8/15  | City, Milan                                            | Hospital based home care team, multiprofessional                                                                          | Improvements in pain and some symptoms during care                                                                  |
| Silver [35]; US                 | IIIC 9/15  | City, Washington                                       | Multiprofessional hospice home care team—no details of staff or training                                                  | Patients spending longest in programme had greatest improvements in control of problems                             |
| Tramarin et al. [36]; Italy     | IIB 10/15  | Northern Italy, suburban, city, rural                  | Trained nurses with family doctor, psychologist and other team members                                                    | Cost savings of 35% for intervention group                                                                          |
| Ventafriidda et al. [37]; Italy | IIB 11/15  | Milan, city area                                       | Multiprofessional team, providing home care counselling                                                                   | Pain, weakness and anxiety improved most in home care group                                                         |
| Ventafriidda et al. [38]; Italy | IIB 11/15  | Milan, city area                                       | Multiprofessional home care team from palliative foundation                                                               | Home care group had better quality of life and performance than controls, with lower costs                          |
| Vinciguerra et al. [39, 40]; US | IIB 8/15   | City, New York                                         | Oncology based home care team                                                                                             | Home care group had similar performance status and survival to controls, had less morphine. Service had lower costs |
| Zimmer et al. [41]; US          | IB 12/15   | City, New York                                         | Multiprofessional home care team, with background in geriatric care                                                       | Home care group had greater satisfaction and lower use of hospital services and lower costs than control group      |

**Table 6.** Results of studies of inpatient hospice and palliative care services

| Author, country                                                                                    | Grade and signal score | Setting                                              | Intervention                                                                                                               | Outcome                                                                                                                                                                                                  |
|----------------------------------------------------------------------------------------------------|------------------------|------------------------------------------------------|----------------------------------------------------------------------------------------------------------------------------|----------------------------------------------------------------------------------------------------------------------------------------------------------------------------------------------------------|
| Studies where the intervention was primarily an inpatient service, hospice or palliative care unit |                        |                                                      |                                                                                                                            |                                                                                                                                                                                                          |
| Hinton [23]; UK                                                                                    | IIC 12/15              | London, city and suburban areas                      | Hospice, versus hospital and foundation home, some home care was available                                                 | Hospices received most satisfaction, hospital was between foundation home and hospital                                                                                                                   |
| McIlmurray and Warren [42]; UK                                                                     | IIC 11/15              | Lancaster, urban, suburban and rural                 | Hospice palliative care service, mean length of stay 21 days                                                               | Symptom control improved during care                                                                                                                                                                     |
| Viney et al. [43]; Australia                                                                       | IIB 8/15               | Wollongong, rural and suburban area New South Wales  | Two palliative care inpatient units (one small, one large) versus general hospital                                         | Patients in palliative care units had higher quality of life and less anxiety than did hospital patients. The small palliative care unit patients expressed more helplessness than the hospital patients |
| Studies where the intervention was of an integrated hospice and home care service                  |                        |                                                      |                                                                                                                            |                                                                                                                                                                                                          |
| Dunt et al. [44]; Australia                                                                        | IIB 8/15               | Melbourne, city and suburban                         | Ten hospice beds, 50 nursing home beds and home care team                                                                  | Hospice patients had shorter pain duration, higher satisfaction with care than control group. Costs and amount of home care similar                                                                      |
| Kane et al. [45, 47]; Wales et al. [46]; US                                                        | IA 10/15               | Los Angeles, California, city                        | Inpatient hospice unit on general hospital ward, with home care consultation versus conventional care                      | No significant difference in symptom prevalence or survival, some advantage for hospice in interpersonal care and carer satisfaction.                                                                    |
| Mor et al. [48]; Morris et al. [49]; US                                                            | IIB 11/15              | Multiple settings, urban and rural across the US     | Inpatient hospices with beds and home care programmes, and primarily home care hospice programmes versus conventional care | More satisfaction from carers with both models of hospice care, but few differences in patient satisfaction or quality of life. Hospice home care group were least likely to have had pain               |
| Parkes [50]; UK                                                                                    | IIC 10/15              | London, city and suburban                            | Inpatient hospice with home care programme                                                                                 | Improvement overall during a 10 year period in hospital settings. Initially improved symptom control and satisfaction for hospice group                                                                  |
| Seale [51]; UK                                                                                     | IIIA 11/15             | London, city and suburban                            | Inpatient hospice programme with home care team, versus conventional care                                                  | Better pain control in inpatient hospice, satisfaction high in all settings                                                                                                                              |
| Wakefield and Ashby [52]; Australia                                                                | IIB 9/15               | South Australia, Adelaide, urban, suburban and rural | Range of different inpatient hospice and home care services and conventional care                                          | Hospice care significantly more likely to be rated as excellent and as the right place to die                                                                                                            |

structures, often with unclear training of staff. The hospice and palliative care services were compared with a range of other alternatives, hospital care, a foundation home or conventional home and hospital care.

In general, the outcomes were more positive than negative, indicating similar or greater satisfaction, particularly for carers and similar or improved symptom control in the palliative care/hospice group. Data regarding quality of life was largely equivocal.

### Other models of palliative care

The review identified no studies examining day care, outpatient hospice care or nurse specialists working independently of a multi-professional service.

### Discussion and conclusions

The qualitative appraisal of the literature is concordant with that of the quantitative analysis, indicating small positive benefits for hospice and palliative care services. The qualitative review was able to assess to a limited extent whether effects were found by different models of service. Although the number of studies were small, there does not appear to be any major difference between city, urban and rural areas in the results found. However, this finding needs to be interpreted with caution, as many of the studies were of poor quality, the interventions were varied and the outcomes measured varied also. One of the most consistent effects was of improved satisfaction for carers, and to a lesser extent for patients when the services were compared to conventional or non-hospice services. In some instances improved pain and symptom control or lessened anxiety was found. Most evidence is available for home care services, with a smaller number of studies of inpatient hospice or palliative care and a small number of poor quality studies considering hospital support, although it does seem that these services reduce time in hospital.

Overall, the review supports the effectiveness of palliative care teams in differing settings, and there appears to be an advantage of multidisciplinary over uni-disciplinary teams.

### Funding

This study was funded by the Wales Office for Research and Development and the findings have been reported in peer reviewed journals [4–6].

### References

1. Directory of Hospice and Specialist Palliative Care Services, Hospice Information Service, St Christopher's Hospice, London 1999.
2. Russell IT, Di Blasi Z, Lambert M, Russell D. Systematic reviews and meta-analyses: opportunities and threats. In Templeton AA, Cooke ID, O'Brien PMS (eds): Evidence Based Fertility Treatment. London: Royal College of Obstetricians & Gynaecologists Press 1998.
3. Vine MF, Margolin BH, Morrison HI, Hulka BS. Cigarette smoking and sperm density: a meta-analysis. *Fertility Sterility* 1994; 61: 35–43.
4. Higginson IJ, Finlay IG, Goodwin DM et al. Is there evidence that palliative care teams alter end-of-life experiences of patients and their caregivers? *J Pain Symptom Manage* 2001; 22: 797–801.
5. Cook AM, Finlay IG, Edwards AGK et al. Efficiency of searching the grey literature in palliative care. *J Pain Symptom Manage* 2001; 22: 797–801.
6. Higginson IJ, Goodwin DM, Finlay IG et al. Do hospital-based palliative teams improve care for patients or families at the end of life? *J Pain Symptom Manage* 2002; in press.
7. Axelsson B, Christensen SB. Evaluation of a hospital-based palliative support service with particular regard to financial outcome measures. *Palliative Med* 1998; 12: 41–49.
8. Axelsson B, Sjoden PO. Quality of life of cancer patients and their spouses in palliative home care. *Palliative Med* 1998; 12: 29–39.
9. Bennett M, Corcoran G. The impact on community palliative care services of a hospital palliative care team. *Palliative Med* 1994; 8: 237–244.
10. Edmonds PM, Stuttaford JM, Penny J et al. Do hospital palliative care teams improve symptom control? Use of modified STAS as an evaluation tool. *Palliative Med* 1998; 12: 345–351.
11. Ellershaw JE, Peat SJ, Boys LC. Assessing the effectiveness of a hospital palliative care team. *Palliative Med* 1995; 9: 145–152.
12. McQuillan R, Finlay I, Branch C et al. Improving analgesic prescribing in a general teaching hospital. *J Pain Symptom Manage* 1996; 11: 172–180.
13. Wenk R, Diaz C, Echeverria M et al. Argentina's WHO Cancer Pain Relief Program: a patient care model. *J Pain Symptom Manage* 1991; 6: 40–43.
14. Zwahlen A. Palliative care unit in a district hospital: analysis of two years experience—multidisciplinary palliative care teams [French]. *Rev Med Suisse Romande* 1991; 111: 761–769.
15. Addington-Hall JM, MacDonald LD, Anderson HR et al. Randomised controlled trial of effects of co-ordinating care for terminally ill cancer patients. *BMJ* 1992; 305: 1317–1322.
16. Higginson IJ, Wade AM, McCarthy M. Effectiveness of two palliative support teams. *J Public Health Med* 1992; 14: 50–56.
17. Higginson IJ, McCarthy M. A prospective study of symptom control by a terminal care support team. In Doyle D (ed.): 1986 International Symposium on Pain Control. London: Royal Society of Medicine 1987; 81–85.
18. Ventafridda V, De Conno F, Vigano A et al. Comparison of home and hospital care of advanced cancer patients. *Tumori* 1989; 75: 619–625.
19. Bloom BS, Kissick PD. Home and hospital cost of terminal illness. *Med Care* 1980; 18: 560–564.
20. Dessloch A, Maiworm M, Florin I, Schulze C. [Hospital care versus home nursing: on the quality of life of terminal tumor patients] Krankenhauspflege versus Hauskrankenpflege: Zur Lebensqualität bei terminalen Tumorpatienten. *Psychother Psychosom Med Psychol* 1992; 42: 424–429.
21. Grande GE, Todd CJ, Barclay SIG, Farquhar MC. A randomised controlled trial of a hospital at home service for the terminally ill. *Palliative Med* 2000; 14: 375–385.
22. Higginson IJ, Hearn J. A multi-centre evaluation of cancer pain control by palliative care teams. *J Pain Symptom Manage* 1997; 14: 29–35.

23. Hinton J. Can home care maintain an acceptable quality of life for patients with terminal cancer and their relatives? *Palliative Med* 1994; 8: 183–196.
24. Hughes SL, Cummings J, Weaver F et al. A randomized trial of the cost effectiveness of VA hospital-based home care for the terminally ill. *Health Serv Res* 1992; 26: 801–817.
25. Jones RVH. Teams and terminal cancer care at home: do patients and carers benefit? *J Interprofessional Care* 1993; 7: 239–245.
26. McCorkle R, Benoliel JQ, Donaldson G et al. A randomised clinical trial of home nursing care for lung cancer patients. *Cancer* 1989; 64: 1375–1382.
27. McCusker J, Stoddard AM. Effects of an expanding home care program for the terminally ill. *Med Care* 1987; 25: 373–385.
28. McMillan SC. Quality of life of primary caregivers of hospice patients with cancer. *Cancer Practice* 1996; 4: 191–198.
29. McMillan SC, Mahon M. A study of quality of life of hospice patients on admission and at week 3. *Cancer Nurs* 1994; 17: 52–60.
30. McMillan SC, Mahon M. The impact of hospice services on the quality of life of primary caregivers. *Oncol Nurs Forum* 1994; 21: 1189–1195.
31. McWhinney IR, Bass MJ, Donner A. Evaluation of a palliative care service: problems and pitfalls. *BMJ* 1994; 309: 1340–1342.
32. Mulligan JCA. Dying at home: an evaluation of a specialist home care service. PhD thesis, University of Wales, 1989; 1–386.
33. Parkes CM. Terminal care: evaluation of an advisory domiciliary service at St Christopher's hospice. *Postgrad Med J* 1980; 56: 685–689.
34. Peruselli C, Paci E, Franceschi P et al. Outcome evaluation in a home palliative care service. *J Pain Symptom Manage* 1997; 13: 158–165.
35. Silver S. Evaluation of a hospice program: Effects on terminally ill patients and their families. *Eval Health Prof* 1981; 4: 306–315.
36. Tramarin A, Milocchi F, Tolley K et al. An economic evaluation of home-care assistance for AIDS patients: a pilot study in a town in Northern Italy. *AIDS* 1992; 6: 1377–1383.
37. Ventafridda V, Tamburini M, Selmi S. The importance of a home care program for patients with advanced cancer. *Tumori* 1985; 71: 449–454.
38. Ventafridda V, De Conno F, Ripamonti C et al. Quality-of-life assessment during a palliative care programme. *Ann Oncol* 1990; 1: 415–420.
39. Vinciguerra V, Degnan T, Scidatino A et al. A comparative assessment of home versus hospital comprehensive treatment for advanced cancer patients. *J Clin Oncol* 1986; 4: 1521–1528.
40. Vinciguerra V, Degnan T, Budman D et al. A comparative cost analysis of home and hospital treatment. *Prog Clin Biol Res* 1986; 216: 155–164.
41. Zimmer JG, Groth Juncker A, McCusker J. A randomized controlled study of a home health care team. *Am J Public Health* 1985; 75: 134–141.
42. McIllmurray MB, Warren MR. Evaluation of a new hospice: the relief of symptoms in cancer patients in the first year. *Palliative Med* 1989; 3: 135–140.
43. Viney LL, Walker BM, Robertson T et al. Dying in palliative care units and in hospital: a comparison of the quality of life of terminal cancer patients. *J Consult Clin Psychol* 1994; 62: 157–164.
44. Dunt DR, Cantwell AM, Temple-Smith MJ. The cost-effectiveness of the Citymission Hospice Programme, Melbourne. *Palliative Med* 1989; 3: 125–134.
45. Kane RL, Berstein L, Wales J, Rothenberg R. Hospice effectiveness in controlling pain. *JAMA* 1985; 253: 2683–2686.
46. Wales J, Kane R, Robbins S et al. Hospice evaluation study: Methodology and instrumentation. *Med Care* 1983; 21: 734–744.
47. Kane RL, Klein SJ, Bernstein L, Rothenberg R. The role of hospice in reducing the impact of bereavement. *J Chron Dis* 1986; 39: 735–742.
48. Mor V, Schwartz R, Laliberte L, Hiris J. An examination of the effect of reimbursement and organisational structure on the allocation of hospice staff time. *Home Health Care Serv Q* 1985; 6: 101–118.
49. Morris JN, Mor V, Goldberg RJ et al. The effect of treatment setting and patient characteristics on pain in terminal cancer patients: A report from the National Hospice Study. *J Chron Dis* 1986; 39: 27–35.
50. Parkes CM. Terminal care: evaluation of in-patient services at St Christopher's Hospice: Part 2—self assessment of effects of the service on surviving spouses. *Postgrad Med J* 1979; 55: 523–527.
51. Seale C. A comparison of hospice and conventional care. *Soc Sci Med* 1991; 32: 147–152.
52. Wakefield M, Ashby M. Attitudes of surviving relatives to terminal care in South Australia. *J Pain Symptom Manage* 1993; 8: 529–538.
